# Supplementary material for: Volatile Metabolites to Assess the Onset of Chilling Injury in Fresh-Cut Nectarines
Source: MDPI journal article supplement (doi:10.3390/foods13071047), 2024-03-29
Supplement: s1 [file s1]

# Volatile Metabolites to Assess the Onset of Chilling Injury in Fresh-Cut Nectarines

**Table S1.** - Volatile organic compounds (VOCs) detected in nectarine cv Big Bang and their identification codes.

| Metabolite                        | Code | <sup>a</sup> Ri/Ri <sub>sp</sub> | <sup>b</sup> ID | Metabolite               | Code | <sup>a</sup> Ri/Ri <sub>sp</sub> | <sup>b</sup> ID |
|-----------------------------------|------|----------------------------------|-----------------|--------------------------|------|----------------------------------|-----------------|
| <b>Esters</b>                     |      |                                  |                 | <b>Aldehydes</b>         |      |                                  |                 |
| Ethyl acetate                     | E1   | 935/921                          | RI/MS/S         | Hexanal                  | Ald1 | 1076/1075                        | RI/MS/S         |
| Ethyl propionate                  | E2   | 973/971                          | RI/MS/S         | 3-Hexenal                | Ald2 | 1137/1134                        | RI/MS/S         |
| Propyl acetate                    | E3   | 984/982                          | RI/MS/S         | Heptanal                 | Ald3 | 1191/1190                        | RI/MS/S         |
| 2-Methylpropyl acetate            | E4   | 1013/1012                        | RI/MS/S         | 2-Hexenal                | Ald4 | 1227/1224                        | RI/MS/S         |
| Ethyl butyrate                    | E5   | 1033/1032                        | RI/MS/S         | Octanal                  | Ald5 | 1292/1291                        | RI/MS/S         |
| Methyl hexanoate                  | E6   | 1191/1190                        | RI/MS/S         | <i>trans</i> -2-Heptenal | Ald6 | 1329/1326                        | RI/MS/S         |
| Hexyl acetate                     | E7   | 1274/1275                        | RI/MS/S         | 2-Octenal                | Ald7 | 1430/1430                        | RI/MS/S         |
| <i>trans</i> -3-Hexenyl acetate   | E8   | 1316/1316                        | RI/MS/S         | Decanal                  | Ald8 | 1505/1505                        | RI/MS/S         |
| <i>cis</i> -2-Hexenyl acetate     | E9   | 1333/1331                        | RI/MS/S         | Benzaldehyde             | Ald9 | 1529/1529                        | RI/MS/S         |
| Ethyl octanoate                   | E10  | 1430/1430                        | RI/MS/S         | <b>Ketones</b>           |      |                                  |                 |
| <i>cis</i> -3-Hexenyl isobutyrate | E11  | 1456/1482                        | RI/MS/S         | 3-Pentanone              | K1   | 988/986                          | RI/MS/S         |
| 2-Hexenyl butyrate                | E12  | 1471/1466                        | RI/MS/S         | 1-Penten-3-one           | K2   | 1024/1024                        | RI/MS/S         |
| Hexyl octanoate                   | E13  | 1609/1608                        | RI/MS/S         | 3-Octanone               | K3   | 1258/1258                        | RI/MS/S         |
| <i>cis</i> -3-Hexenyl hexanoate   | E14  | 1656/1654                        | RI/MS/S         | 1-Octen-3-one            | K4   | 1305/1305                        | RI/MS/S         |
| <i>cis</i> -2-Hexenyl hexanoate   | E15  | 1671/1653                        | RI/MS           | <b>Terpenes</b>          |      |                                  |                 |
| <b>Alcohols</b>                   |      |                                  |                 | dl-Limonene              | T1   | 1192/1190                        | RI/MS/S         |
| 1-Penten-3-ol                     | A11  | 1171/1170                        | RI/MS/S         | Linalool                 | T2   | 1548/1548                        | RI/MS/S         |
| <i>cis</i> -2-Penten-1-ol         | A12  | 1324/1322                        | RI/MS           | $\alpha$ -Farnesene      | T3   | 1749/1749                        | RI/MS           |
| 1-Hexanol                         | A13  | 1355/1354                        | RI/MS/S         | <b>Acids</b>             |      |                                  |                 |
| <i>cis</i> -3-Hexen-1-ol          | A14  | 1363/1363                        | RI/MS/S         | Pentanoic acid           | Ac1  | 1670/1686                        | RI/MS/S         |
| <i>trans</i> -3-Hexen-1-ol        | A15  | 1382/1381                        | RI/MS/S         | Hexanoic acid            | Ac2  | 1847/1847                        | RI/MS/S         |
| <i>trans</i> -2-Hexen-1-ol        | A16  | 1403/1403                        | RI/MS/S         | <b>Others</b>            |      |                                  |                 |
| 1-Octen-3-ol                      | A17  | 1449/1449                        | RI/MS/S         | 2-Ethylfuran             | O1   | 970/965                          | RI/MS/S         |
| 2-Ethyl-1-hexanol                 | A18  | 1492/1491                        | RI/MS/S         | Heptadecane              | O2   | 1701/1700                        | RI/MS/S         |
| 1-Octanol                         | A19  | 1560/1560                        | RI/MS/S         | $\gamma$ -Caprolactone   | O3   | 1704/1703                        | RI/MS/S         |
| 2-Furanmethanol                   | A110 | 1663/1663                        | RI/MS/S         |                          |      |                                  |                 |

<sup>a</sup>Ri: Relative retention indices on polar column reported in literature by [www.pherobase.com](http://www.pherobase.com); [www.flavornet.org](http://www.flavornet.org); [www.ChemSpider.com](http://www.ChemSpider.com); [webbook.nist.gov](http://webbook.nist.gov); RI<sub>sp</sub>: Relative retention indices calculated against n-alkanes (C<sub>8</sub>-C<sub>40</sub>) on HP-Innowax column; <sup>b</sup>Identification method as indicated by the following: RI: Kovats retention index on a on HP-Innowax column; MS: NIST and Wiley libraries spectra; S: co-injection with authentic standard compounds on the HP-Innowax column
